# Supplementary material for: Zooming into the binding groove of HLA molecules: which positions and which substitutions change peptide binding most?
Source: PubMed Central journal article supplement (PMC4498290; doi:10.1007/s00251-015-0849-y), 2015-06-04
Supplement: 251_2015_849_MOESM1_ESM.pdf [file 251_2015_849_MOESM1_ESM.pdf]

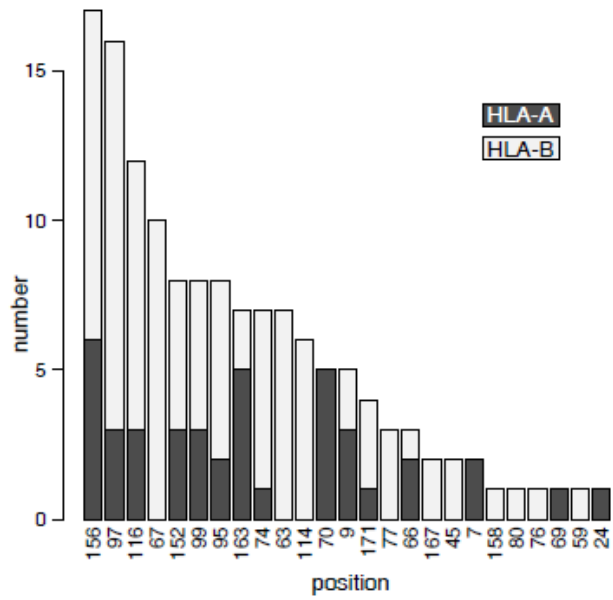

**Fig. S1** The distribution of HLA pairs with a single substitution ( $n=138$ ). The positions are ranked according to their frequencies among the HLA pairs.
