# Supplementary material for: Zooming into the binding groove of HLA molecules: which positions and which substitutions change peptide binding most?
Source: PubMed Central journal article supplement (PMC4498290; doi:10.1007/s00251-015-0849-y), 2015-06-04
Supplement: 251_2015_849_MOESM3_ESM.pdf [file 251_2015_849_MOESM3_ESM.pdf]

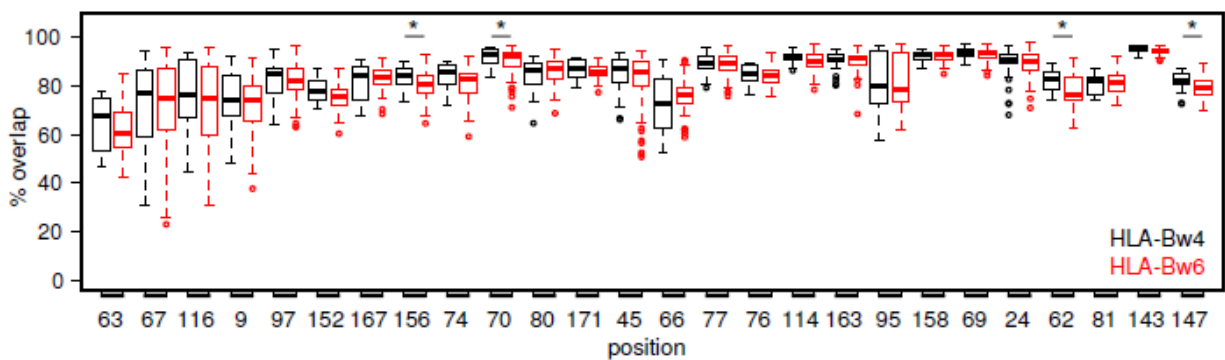

**Fig. S3 The HLA-B molecules carrying BW6 motif are more sensitive to amino acid substitutions.** HLA-B molecules are divided into two groups based on Bw4 and Bw6 motif. The p values are calculated using the Mann Whitney U test with \*  $p < 0.05$ . The overall median of the HLA-B molecules with a Bw6 motif is lower than that of molecules with a Bw4 motif, paired Mann Whitney U test,  $p = 0.0001$ .
